# Supplementary material
Source: PubMed Central journal article supplement (PMC4200494)

## Figure S1 (Stereology-associated data)

**A** Representative NAcore GFAP<sup>+</sup> histochemistry  
naive (age-matched) EtOH-IA + 24h abst

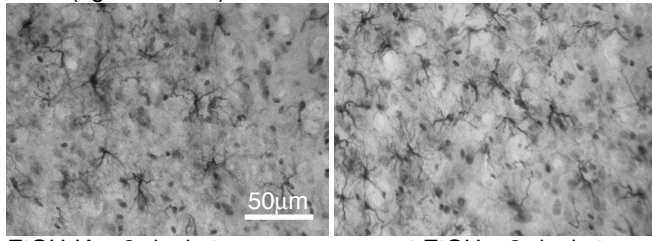

EtOH-IA + 3wk abst operant EtOH + 3wk abst

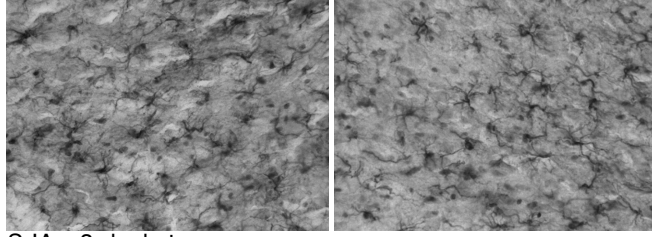

S-IA + 3wk abst

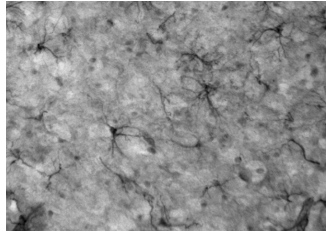

**B** NAcore GFAP expression

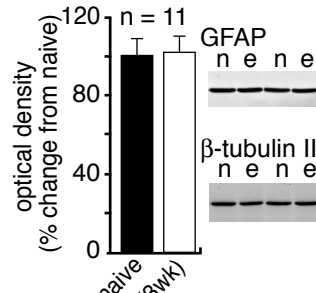

**C** NAcshell astrocytes

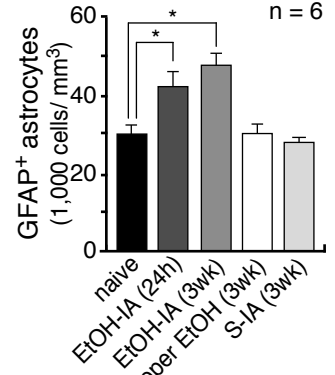

**D** NAcshell other cells

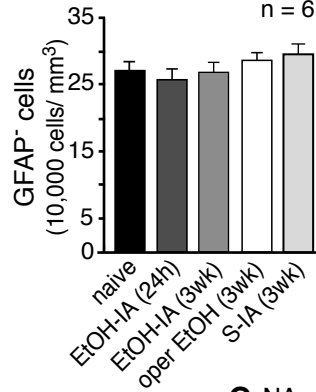

**E** NAcshell volume

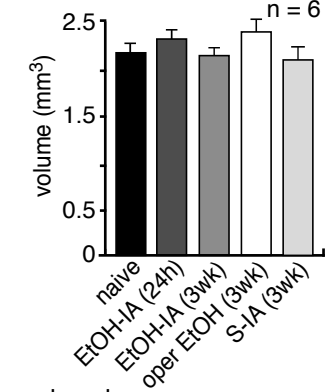

**F** Representative ALDH1L1 histochemistry  
hoechst (nucleus) ALDH1L1 (astrocyte) overlay

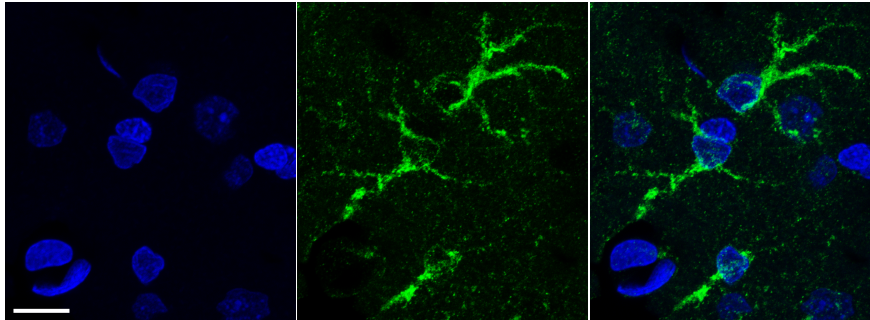

**G** NAcore astrocytes (proportional counting)

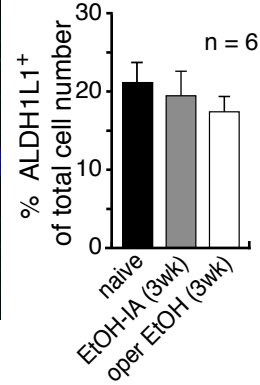

**H** NAcore ALDH1L1 expression **I** NAcore glutamine synthetase

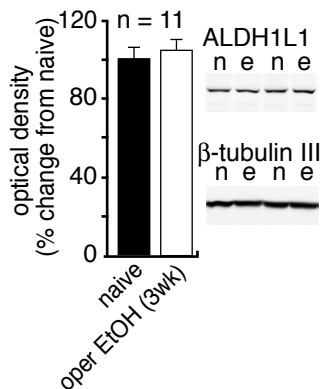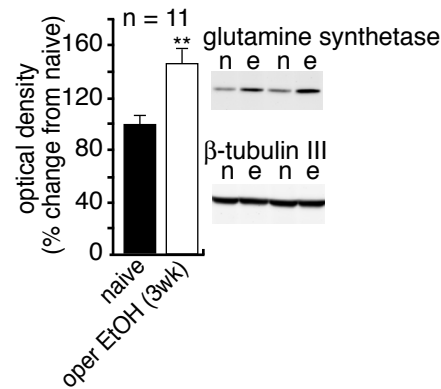

Supplement: npp2014135x2.pdf [file npp2014135x2.pdf]
