# Supplementary material
Source: PubMed Central journal article supplement (PMC4200494)

## Figure S2 (gap-junction hemichannel blockade)

**A** NAcore (ethanol) **B** NAcore (ethanol)

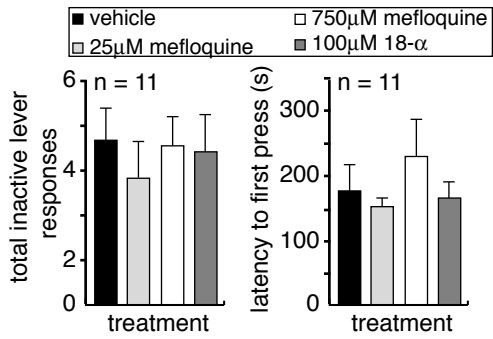

**C** NAcore (ethanol)

relative to bregma:

+1.60 mm

+1.20 mm

+1.00 mm

+0.70 mm

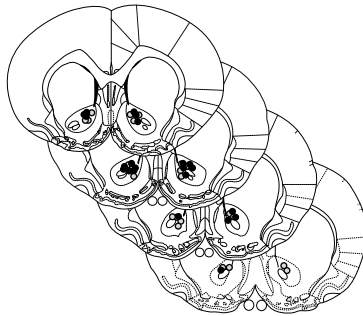

**D** NAcore (sucrose)

relative to bregma:

+1.60 mm

+1.20 mm

+1.00 mm

+0.70 mm

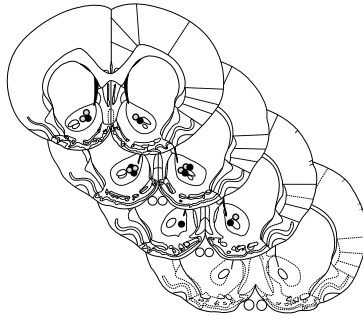

**E** NAshell (ethanol)

relative to bregma:

+1.60 mm

+1.20 mm

+1.00 mm

+0.70 mm

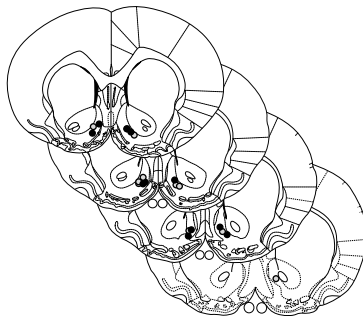

Supplement: npp2014135x3.pdf [file npp2014135x3.pdf]
