# Supplementary material
Source: PubMed Central journal article supplement (PMC4200494)

**Figure S3 (ICSS)**

**A Representative region transfected**

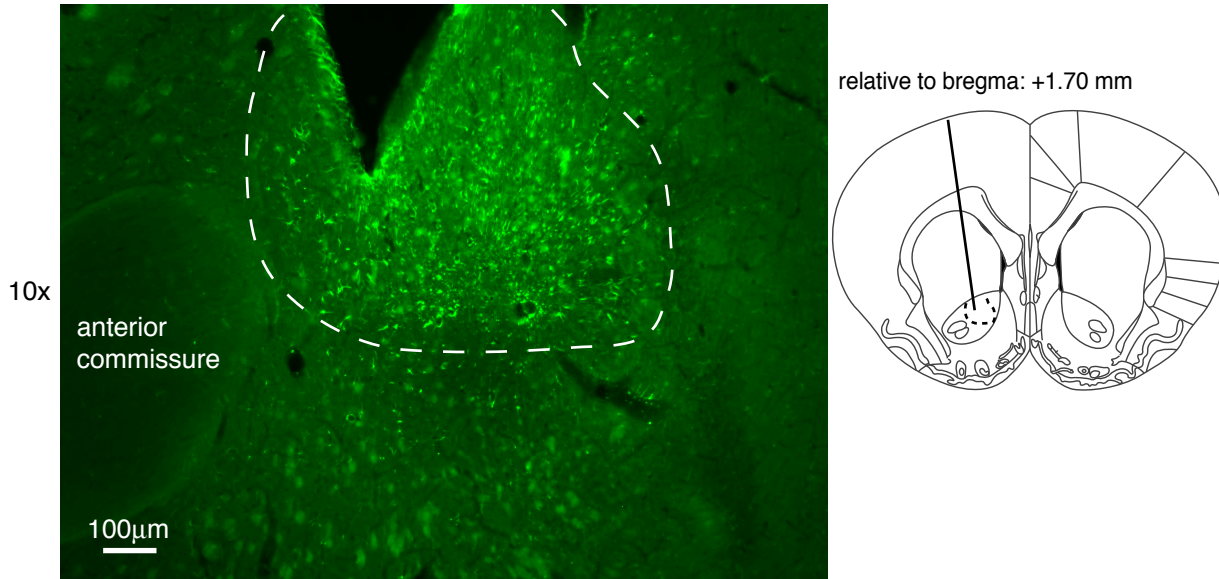

**B Representative Nissl stained near-adjacent**  
Gαq-DREADD expressing    GFP expressing

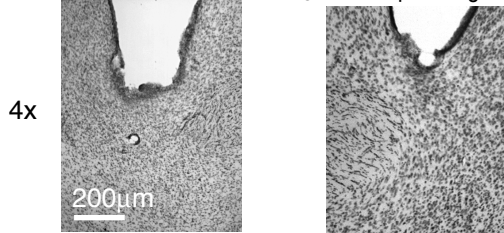

**C GFAP Gαq-DREADD**

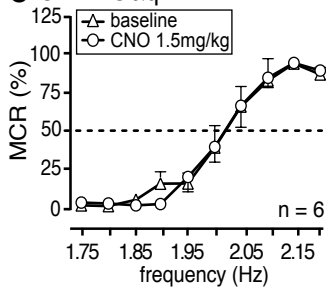

**D GFAP Gαq-DREADD**

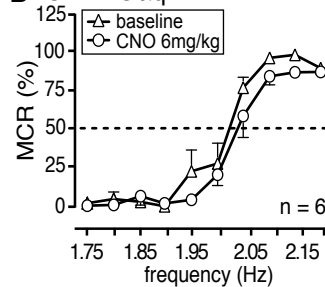

**G Gαq-DREADD injection sites**

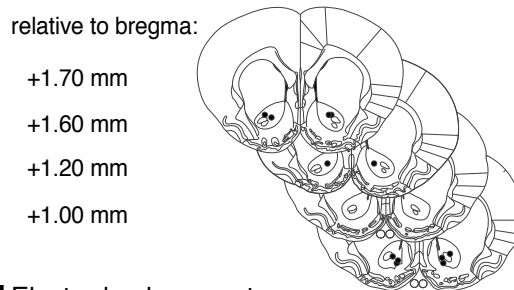

**E No DREADD**

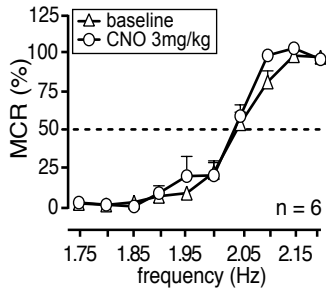

**F GFAP Gαq-DREADD**

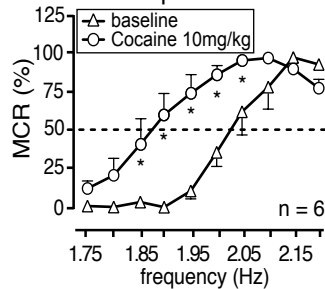

**H Electrode placements**

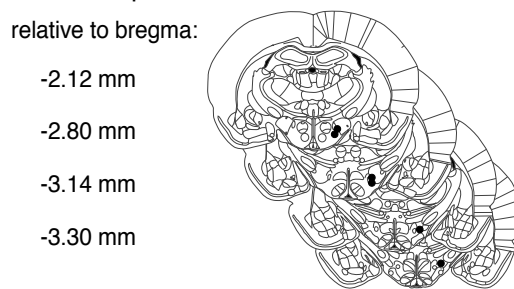

Supplement: npp2014135x4.pdf [file npp2014135x4.pdf]
