# Supplementary material
Source: PubMed Central journal article supplement (PMC4200494)

**Figure S4 (DREADD EtOH)**

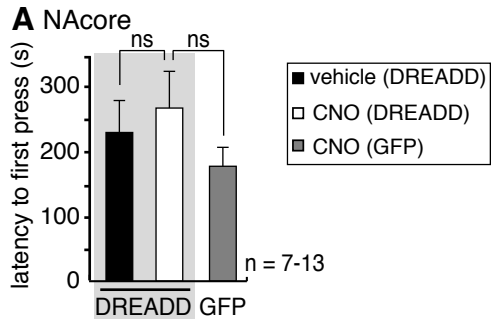

**B**  $G\alpha_q$ -DREADD injection sites

relative to bregma:

+1.20 mm

+1.00 mm

+0.70 mm

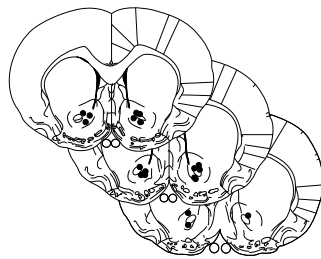

**C** GFP injection sites

relative to bregma:

+1.20 mm

+1.00 mm

+0.70 mm

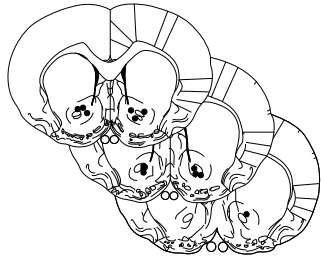

Supplement: npp2014135x5.pdf [file npp2014135x5.pdf]
