# Supplementary material
Source: PubMed Central journal article supplement (PMC4200494)
Supplement: npp2014135x6.pdf [file npp2014135x6.pdf]

**Table S1.** EtOH consumption.

| <b>Experiment</b>                   | <b>BEC (mg/ml)</b> |
|-------------------------------------|--------------------|
| <b>Anion channel blockade</b>       |                    |
| Vehicle                             | 0.09±0.04          |
| Low mefloquine                      | 0.04±0.01          |
| High mefloquine                     | 0.13±0.07          |
| 18- $\alpha$                        | 0.16±0.07          |
| <b>G<math>\alpha</math>q-DREADD</b> |                    |
| Vehicle                             | 0.10±0.03          |
| CNO                                 | 0.01±0.01          |
| <b>GFP</b>                          |                    |
| CNO                                 | 0.10±0.04          |

Data represent the mean±SEM. Blood was collected from a lateral tail vein under light isoflurane anesthesia immediately after breakpoint determination and subjected to gas chromatography with flame ionization detection in order to obtain the blood ethanol concentration (BEC).
